# Supplementary material for: Influence of Iron Addition (Alone or with Calcium) to Elements Biofortification and Antioxidants in Pholiota nameko
Source: MDPI journal article supplement (doi:10.3390/plants10112275), 2021-10-24
Supplement: s1 [file s1]

## Supplementary data

Table S1. Parameters of analytical procedure

| Element | Calibration range<br>up to mg L <sup>-1</sup> | Wavelength<br>nm | Plasma<br>view | DL<br>mg kg <sup>-1</sup> |
|---------|-----------------------------------------------|------------------|----------------|---------------------------|
| Ca      | 2000                                          | 239,856          | axial          | x                         |
| Ca      | 200                                           | 315,887          | radial         | 0,077                     |
| Fe      | 100                                           | 261,187          | radial         | 0,067                     |
| Fe      | 1000                                          | 262,167          | axial          | x                         |
| K       | 2000                                          | 404,414          | axial          | x                         |
| K       | 100                                           | 769,897          | radial         | 0,011                     |
| Mg      | 2000                                          | 279,078          | axial          | x                         |
| Mg      | 50                                            | 285,213          | radial         | 0,041                     |
| Mn      | 20                                            | 257,610          | radial         | 0,015                     |
| Na      | 1000                                          | 330,237          | axial          | x                         |
| Na      | 100                                           | 588,995          | axial          | 0,013                     |
| P       | 1000                                          | 202,349          | axial          | x                         |
| P       | 30                                            | 213,618          | radial         | 0,015                     |
| S       | 1000                                          | 182,565          | axial          | x                         |
| S       | 100                                           | 180,672          | radial         | 0,020                     |

x – calibration for high concentration of element

Table S2. Content [mg kg<sup>-1</sup>] of determined elements in *Pholiota nameko* fruit bodies

| System                            | Ca                       | Fe                         | K                          | Mg                       | Mn                         | Na                       | P                         | S                          |
|-----------------------------------|--------------------------|----------------------------|----------------------------|--------------------------|----------------------------|--------------------------|---------------------------|----------------------------|
| Control                           | 233 <sup>f</sup> ± 11.8  | 8.61 <sup>g</sup> ± 1.19   | 11300 <sup>bc</sup> ± 621  | 440 <sup>d</sup> ± 17.8  | 6.71 <sup>d</sup> ± 0.965  | 104 <sup>d</sup> ± 4.65  | 6640 <sup>cd</sup> ± 290  | 3600 <sup>e</sup> ± 137    |
| Fe <sub>5</sub>                   | 241 <sup>f</sup> ± 19.1  | 15.9 <sup>f</sup> ± 1.78   | 13900 <sup>ab</sup> ± 679  | 651 <sup>c</sup> ± 42.2  | 13.2 <sup>c</sup> ± 1.76   | 130 <sup>c</sup> ± 6.40  | 6950 <sup>bc</sup> ± 63.8 | 4030 <sup>bcd</sup> ± 40.4 |
| Fe <sub>10</sub>                  | 219 <sup>f</sup> ± 27.1  | 19.8 <sup>ef</sup> ± 1.46  | 17200 <sup>ab</sup> ± 404  | 852 <sup>ab</sup> ± 12.9 | 12.4 <sup>c</sup> ± 1.76   | 173 <sup>a</sup> ± 4.01  | 7230 <sup>ab</sup> ± 42.4 | 4140 <sup>a-d</sup> ± 56.0 |
| Fe <sub>15</sub>                  | 225 <sup>f</sup> ± 33.1  | 25.1 <sup>cd</sup> ± 1.54  | 19100 <sup>a</sup> ± 699   | 928 <sup>a</sup> ± 35.0  | 12.2 <sup>c</sup> ± 1.09   | 183 <sup>a</sup> ± 6.19  | 7430 <sup>a</sup> ± 70.7  | 4190 <sup>abc</sup> ± 22.7 |
| Fe <sub>5</sub> Ca <sub>5</sub>   | 458 <sup>e</sup> ± 28.2  | 23.1 <sup>de</sup> ± 1.21  | 7770 <sup>c</sup> ± 4790   | 614 <sup>c</sup> ± 23.2  | 14.0 <sup>c</sup> ± 1.03   | 114 <sup>cd</sup> ± 3.28 | 6410 <sup>de</sup> ± 78.8 | 4030 <sup>bcd</sup> ± 114  |
| Fe <sub>10</sub> Ca <sub>5</sub>  | 698 <sup>d</sup> ± 52.6  | 24.7 <sup>d</sup> ± 0.57   | 16300 <sup>ab</sup> ± 882  | 870 <sup>a</sup> ± 65.1  | 16.6 <sup>bc</sup> ± 0.793 | 153 <sup>b</sup> ± 3.13  | 6640 <sup>cd</sup> ± 86.9 | 4270 <sup>ab</sup> ± 50.7  |
| Fe <sub>15</sub> Ca <sub>5</sub>  | 931 <sup>c</sup> ± 40.4  | 31.6 <sup>b</sup> ± 1.66   | 14400 <sup>ab</sup> ± 441  | 937 <sup>a</sup> ± 26.3  | 20.6 <sup>b</sup> ± 0.966  | 179 <sup>a</sup> ± 3.62  | 6720 <sup>cd</sup> ± 26.5 | 4330 <sup>a</sup> ± 56.0   |
| Fe <sub>5</sub> Ca <sub>10</sub>  | 825 <sup>cd</sup> ± 6.60 | 27.4 <sup>bcd</sup> ± 0.94 | 12700 <sup>bc</sup> ± 319  | 724 <sup>bc</sup> ± 50.4 | 15.0 <sup>c</sup> ± 1.40   | 123 <sup>cd</sup> ± 5.99 | 6250 <sup>e</sup> ± 43.7  | 3940 <sup>cd</sup> ± 40.5  |
| Fe <sub>10</sub> Ca <sub>10</sub> | 1430 <sup>b</sup> ± 83.2 | 29.5 <sup>bc</sup> ± 1.00  | 16200 <sup>ab</sup> ± 970  | 709 <sup>bc</sup> ± 26.1 | 29.5 <sup>a</sup> ± 1.32   | 153 <sup>b</sup> ± 6.80  | 6370 <sup>de</sup> ± 39.5 | 3870 <sup>d</sup> ± 58.4   |
| Fe <sub>15</sub> Ca <sub>10</sub> | 1620 <sup>a</sup> ± 27.9 | 38.3 <sup>a</sup> ± 1.09   | 14800 <sup>ab</sup> ± 1350 | 728 <sup>bc</sup> ± 33.0 | 28.2 <sup>a</sup> ± 1.04   | 175 <sup>a</sup> ± 6.71  | 6230 <sup>e</sup> ± 51.4  | 4110 <sup>abc</sup> ± 71.1 |

n=5, identical superscripts (a, b...) in columns denote no significant differences between means according to a post-hoc Tukey's

HSD test at α=95% following one-way ANOVA
